# Supplementary material
Source: Springer Nature journal article supplement (https://www.springermedizin.de/resource/supplementary/12885_2012_3791_MOESM6_ESM.pdf/9464416)

**A-SCC61****Photon****Carbon ion**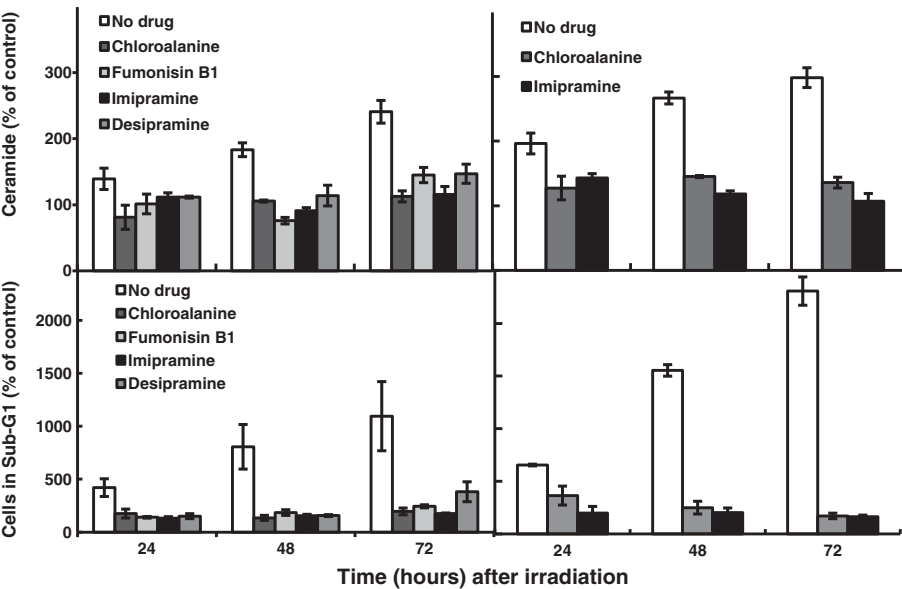**B-SQ20B****Photon****Carbon ion**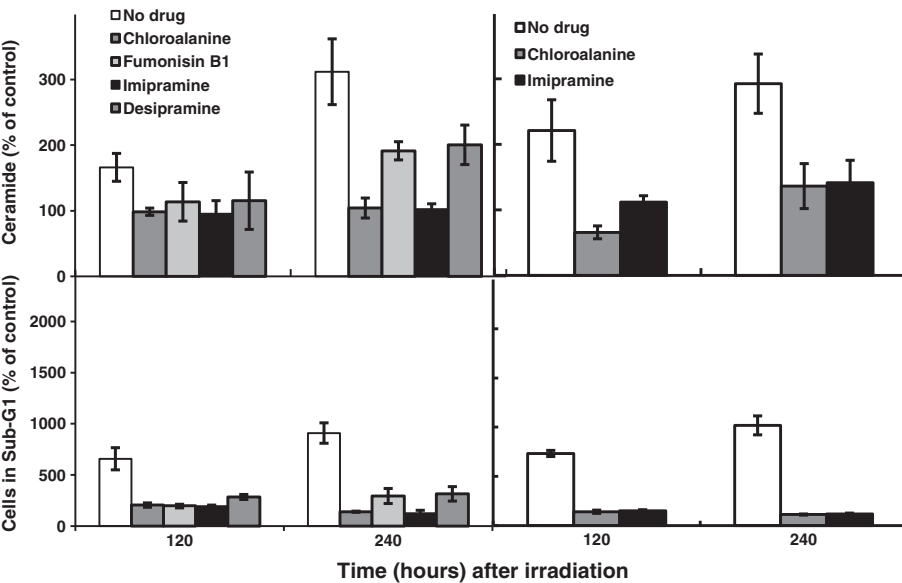

Supplement: MOESM6 [file 9464416]
